# Supplementary material for: Two New Antibiotic Pyridones Produced by a Marine Fungus, Trichoderma sp. Strain MF106
Source: PubMed Central journal article supplement (PMC3967205; doi:10.3390/md12031208), 2014-03-06
Supplement: marinedrugs-12-01208-s001.pdf [file marinedrugs-12-01208-s001.pdf]

## Supplementary Information

- Figure S1.**  $^1\text{H}$  NMR in  $\text{CD}_3\text{OD}$  for compound **1**.  
**Figure S2.**  $^1\text{H}$  NMR-2 in  $\text{CD}_3\text{OD}$  for compound **1**.  
**Figure S3.**  $^{13}\text{C}$  NMR in  $\text{CD}_3\text{OD}$  for compound **1**.  
**Figure S4.** COSY in  $\text{CD}_3\text{OD}$  for compound **1**.  
**Figure S5.** COSY-2 in  $\text{CD}_3\text{OD}$  for compound **1**.  
**Figure S8.** HSQC in  $\text{CD}_3\text{OD}$  for compound **1**.  
**Figure S7.** HSQC-2 in  $\text{CD}_3\text{OD}$  for compound **1**.  
**Figure S8.** HMBC in  $\text{CD}_3\text{OD}$  for compound **1**.  
**Figure S9.** HMBC-2 in  $\text{CD}_3\text{OD}$  for compound **1**.  
**Figure S10.** NOESY in  $\text{CD}_3\text{OD}$  for compound **1**.  
**Figure S11.** NOESY-2 in  $\text{CD}_3\text{OD}$  for compound **1**.  
**Figure S12.**  $^1\text{H}$  NMR in  $\text{CD}_3\text{OD}$  for compound **2**.  
**Figure S13.**  $^1\text{H}$  NMR-2 in  $\text{CD}_3\text{OD}$  for compound **2**.  
**Figure S14.**  $^{13}\text{C}$  NMR in  $\text{CD}_3\text{OD}$  for compound **2**.  
**Figure S15.** COSY in  $\text{CD}_3\text{OD}$  for compound **2**.  
**Figure S16.** HSQC in  $\text{CD}_3\text{OD}$  for compound **2**.  
**Figure S17.** HSQC-2 in  $\text{CD}_3\text{OD}$  for compound **2**.  
**Figure S18.** HMBC in  $\text{CD}_3\text{OD}$  for compound **2**.  
**Figure S19.** HMBC-2 in  $\text{CD}_3\text{OD}$  for compound **2**.  
**Figure S20.** HR-TOF-MS in MeOH for compound **1**.  
**Figure S21.** HR-TOF-MS in MeOH for compound **2**.

Figure S1.  $^1\text{H}$  NMR in  $\text{CD}_3\text{OD}$  for compound 1.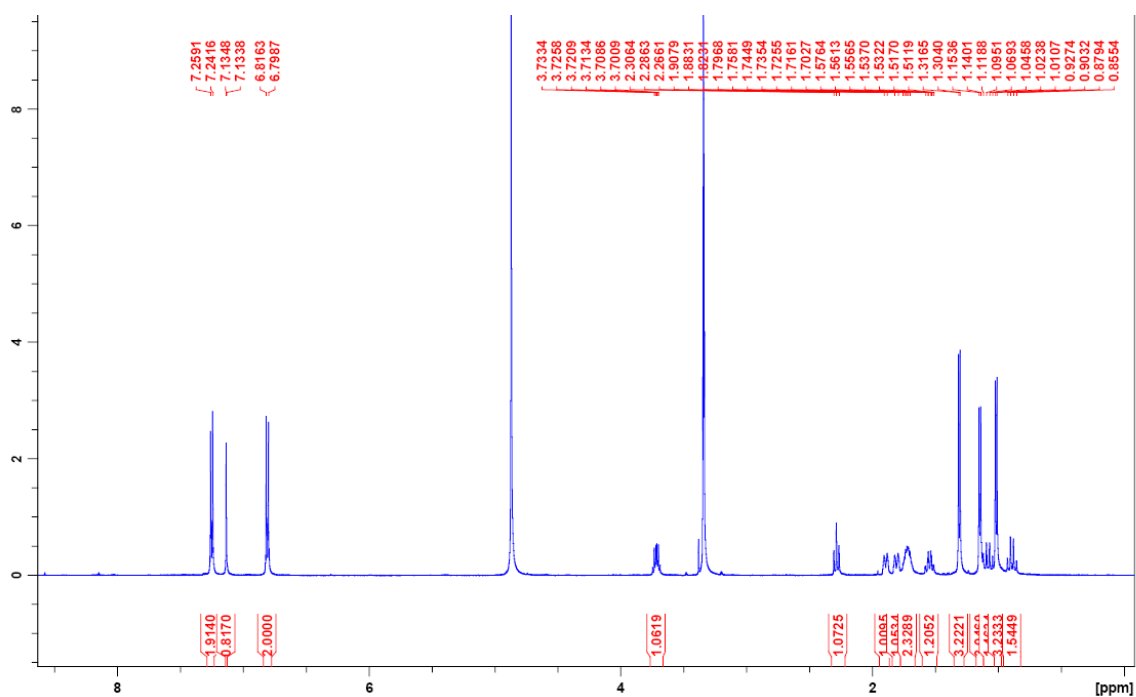Figure S2.  $^1\text{H}$  NMR-2 in  $\text{CD}_3\text{OD}$  for compound 1.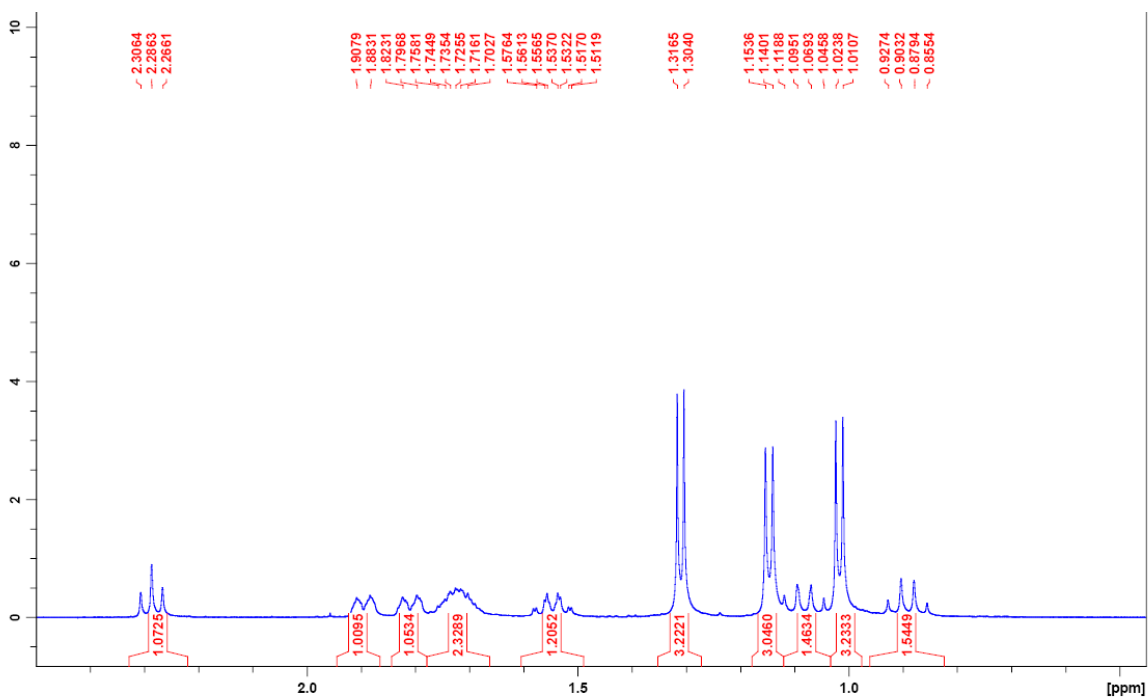

**Figure S3.**  $^{13}\text{C}$  NMR in  $\text{CD}_3\text{OD}$  for compound 1.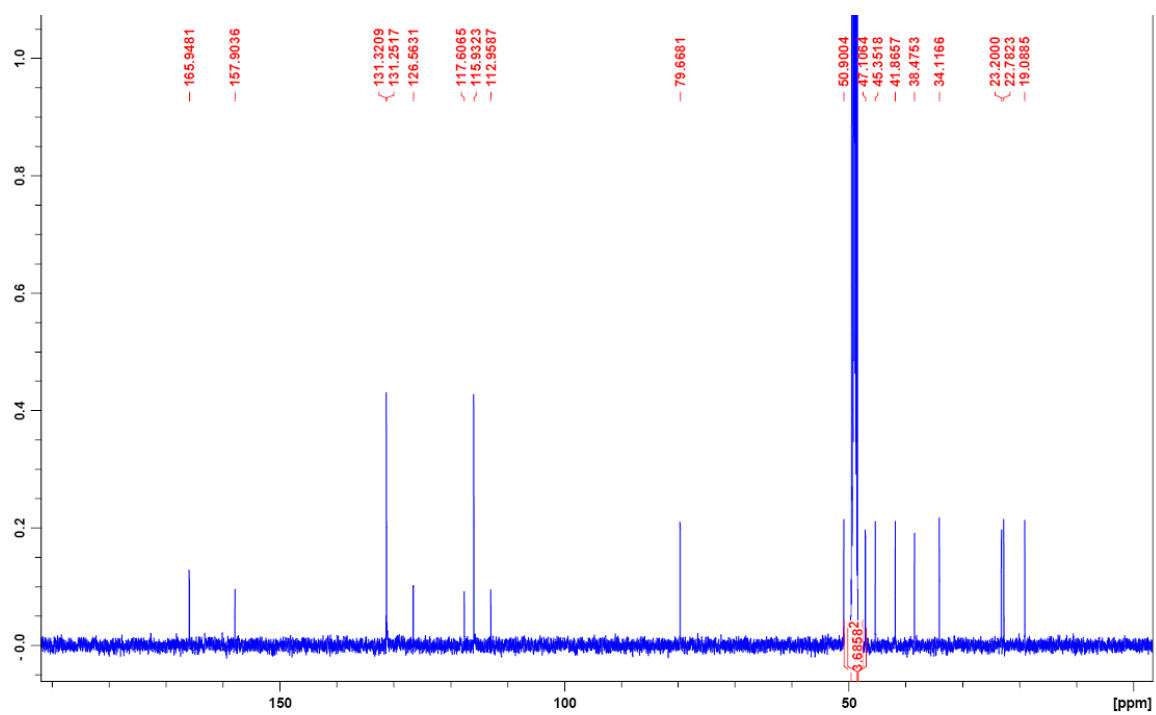**Figure S4.** COSY in  $\text{CD}_3\text{OD}$  for compound 1.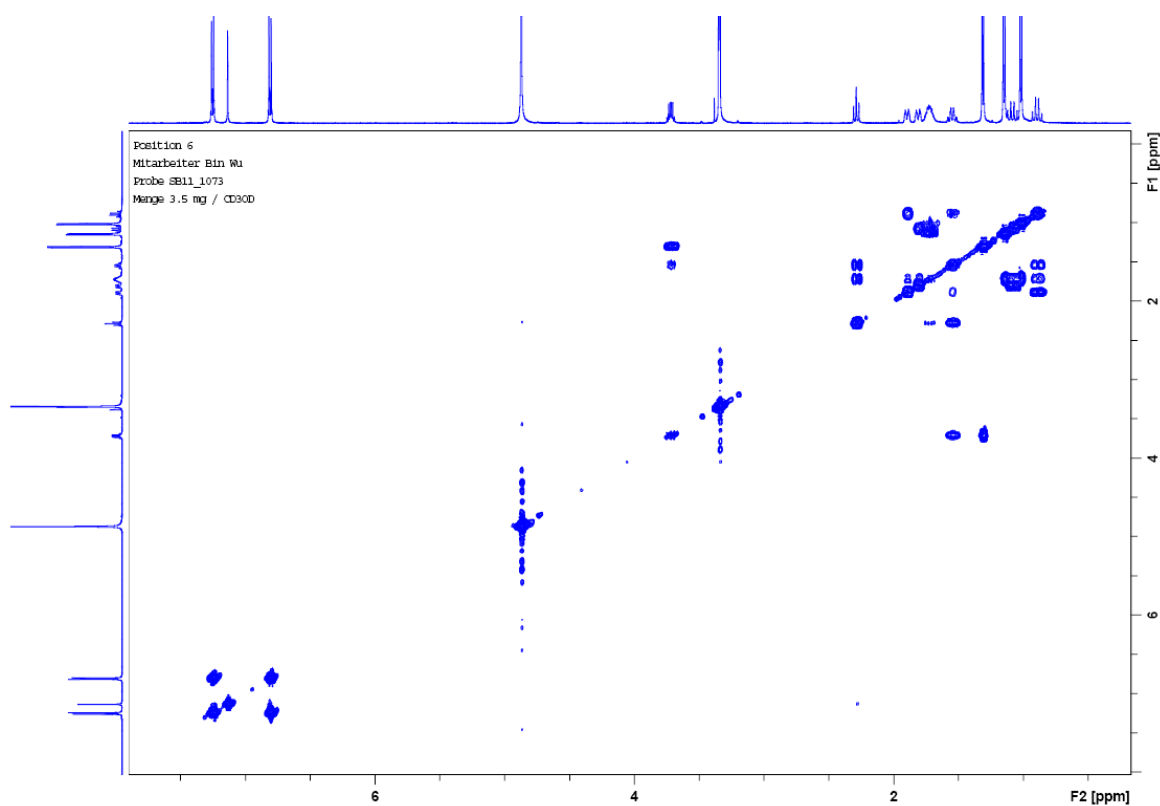

**Figure S5.** COSY-2 in CD<sub>3</sub>OD for compound 1.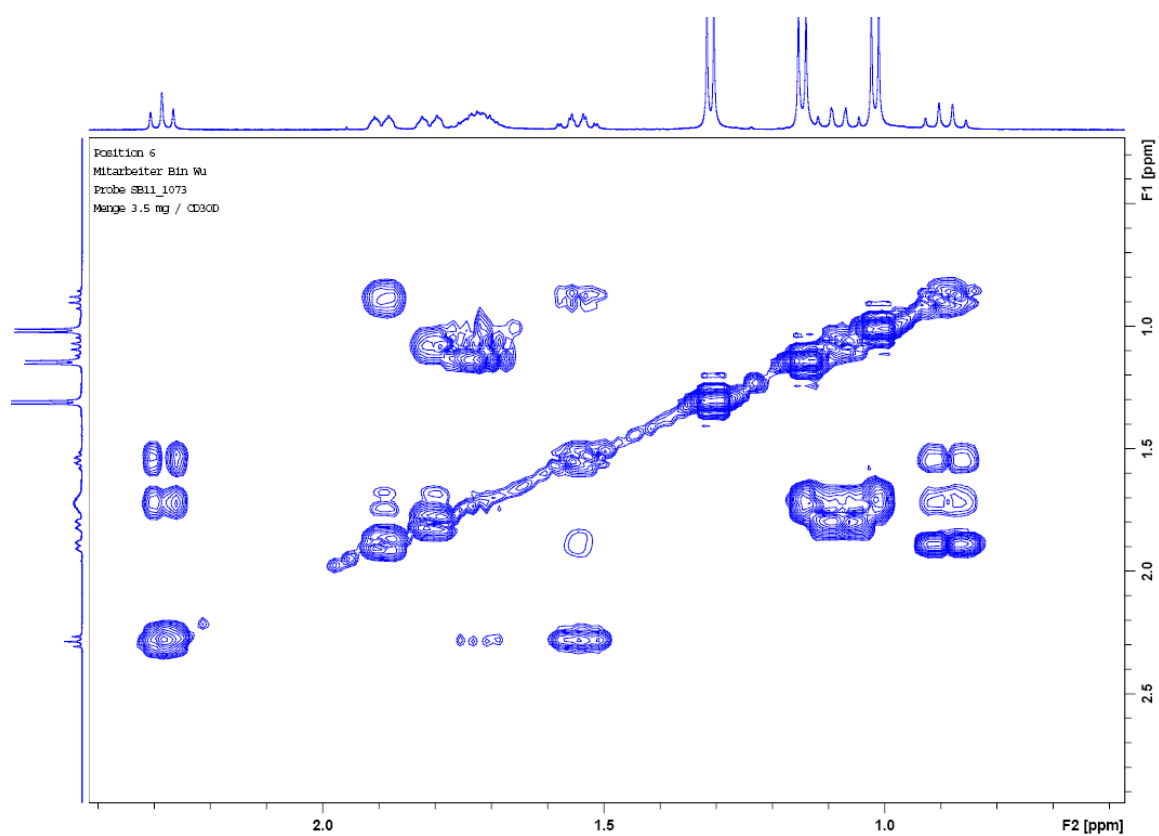**Figure S6.** HSQC in CD<sub>3</sub>OD for compound 1.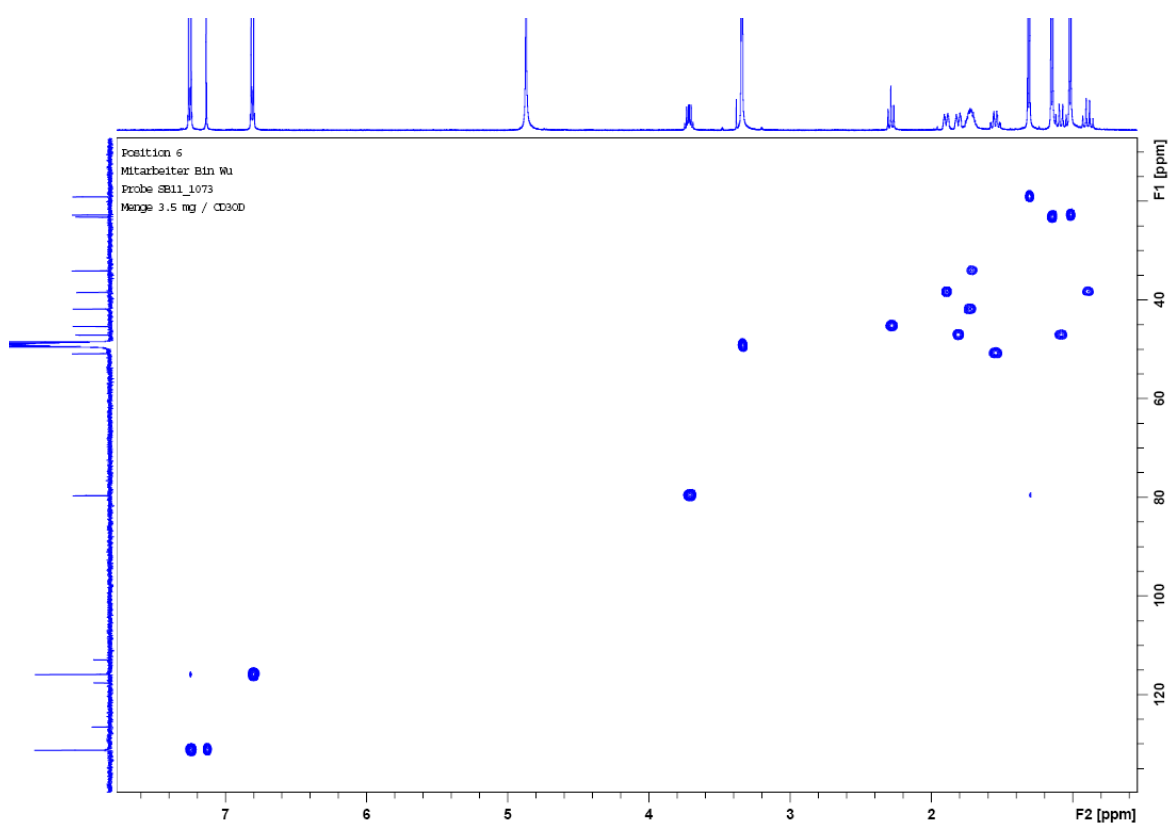

**Figure S7.** HSQC-2 in CD<sub>3</sub>OD for compound **1**.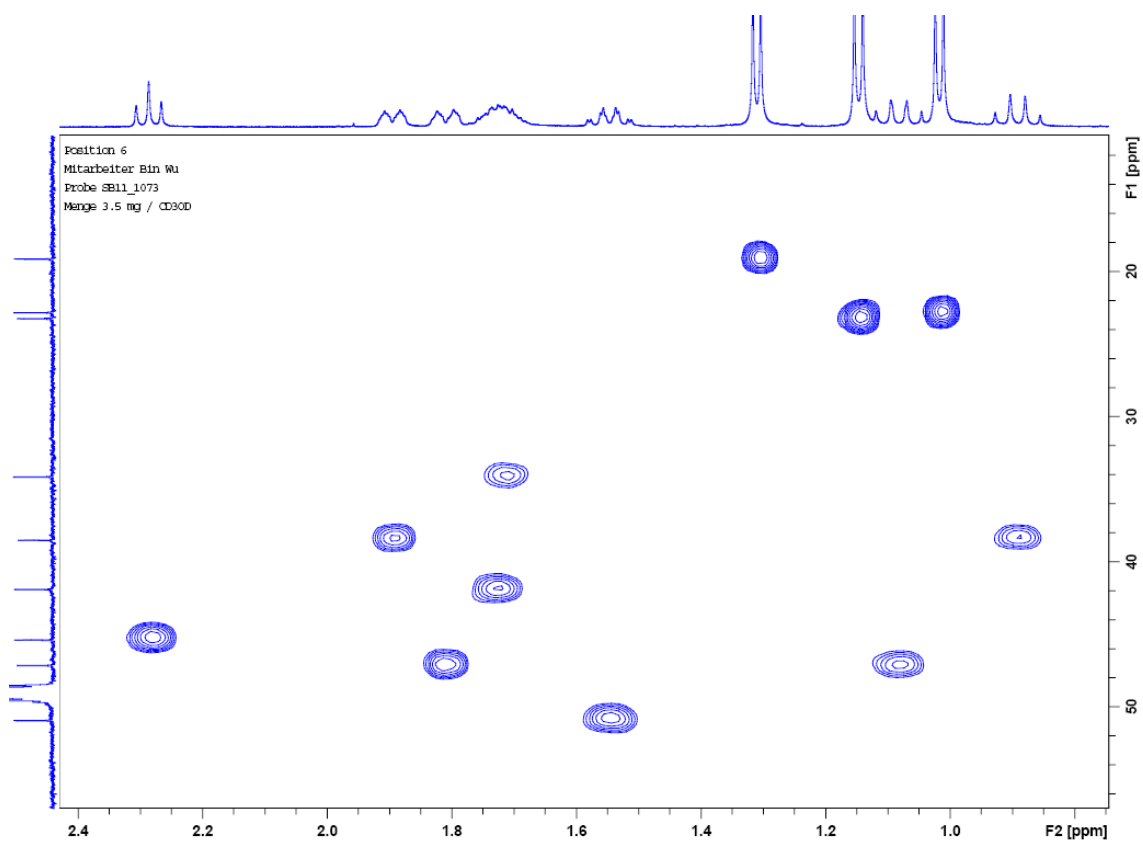**Figure S8.** HMBC in CD<sub>3</sub>OD for compound **1**.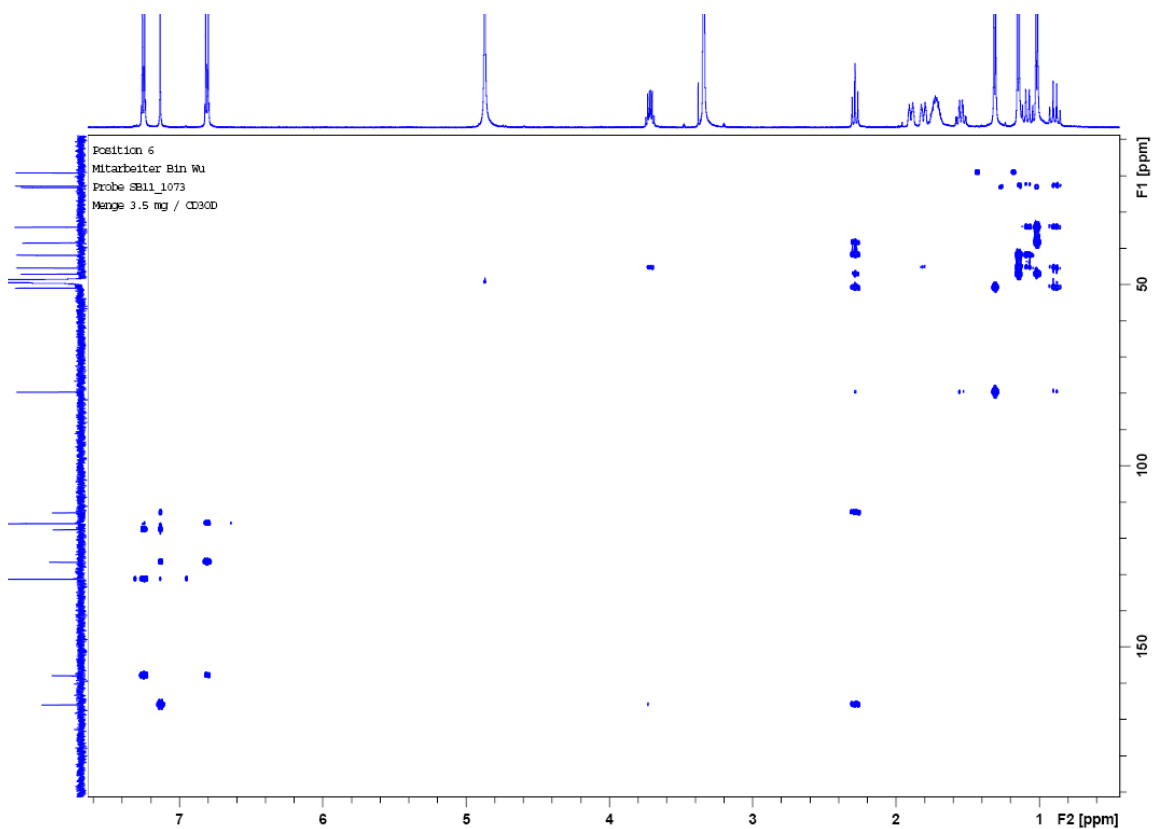

**Figure S9.** HMBC-2 in CD<sub>3</sub>OD for compound 1.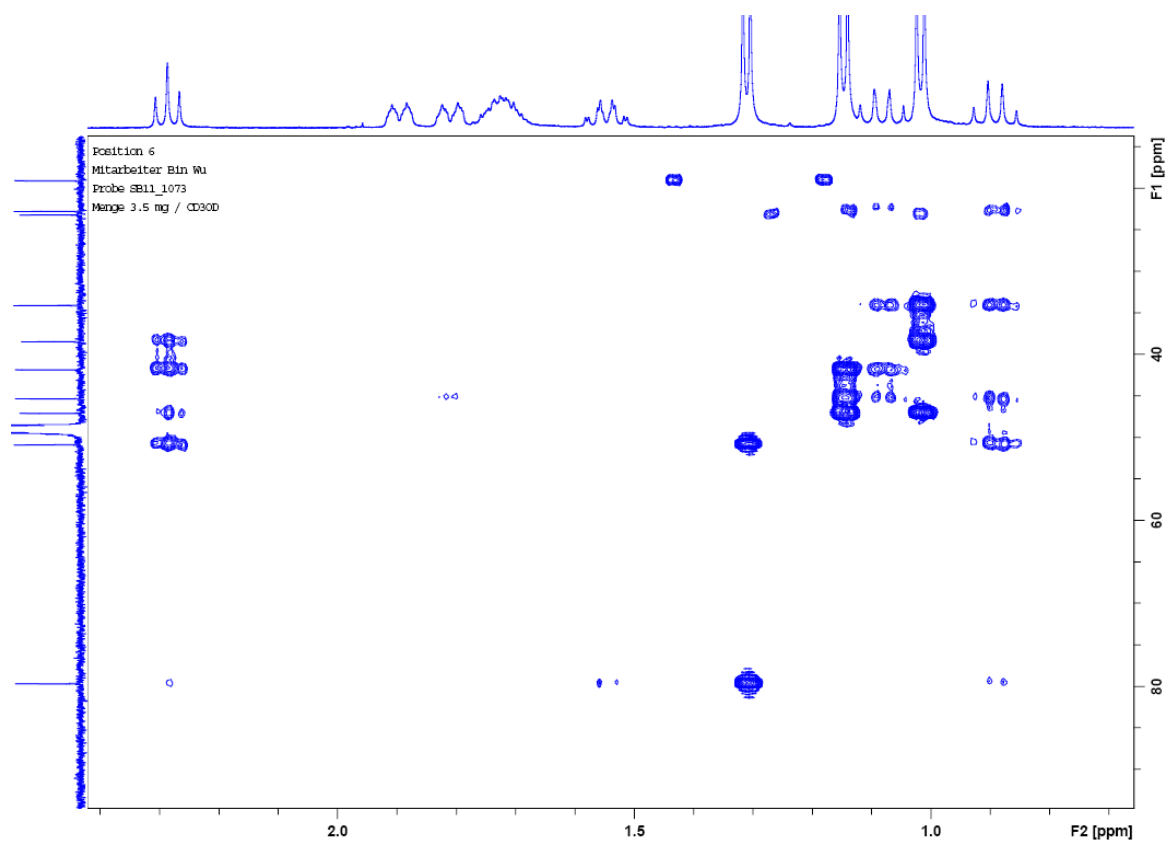**Figure S10.** NOESY in CD<sub>3</sub>OD for compound 1.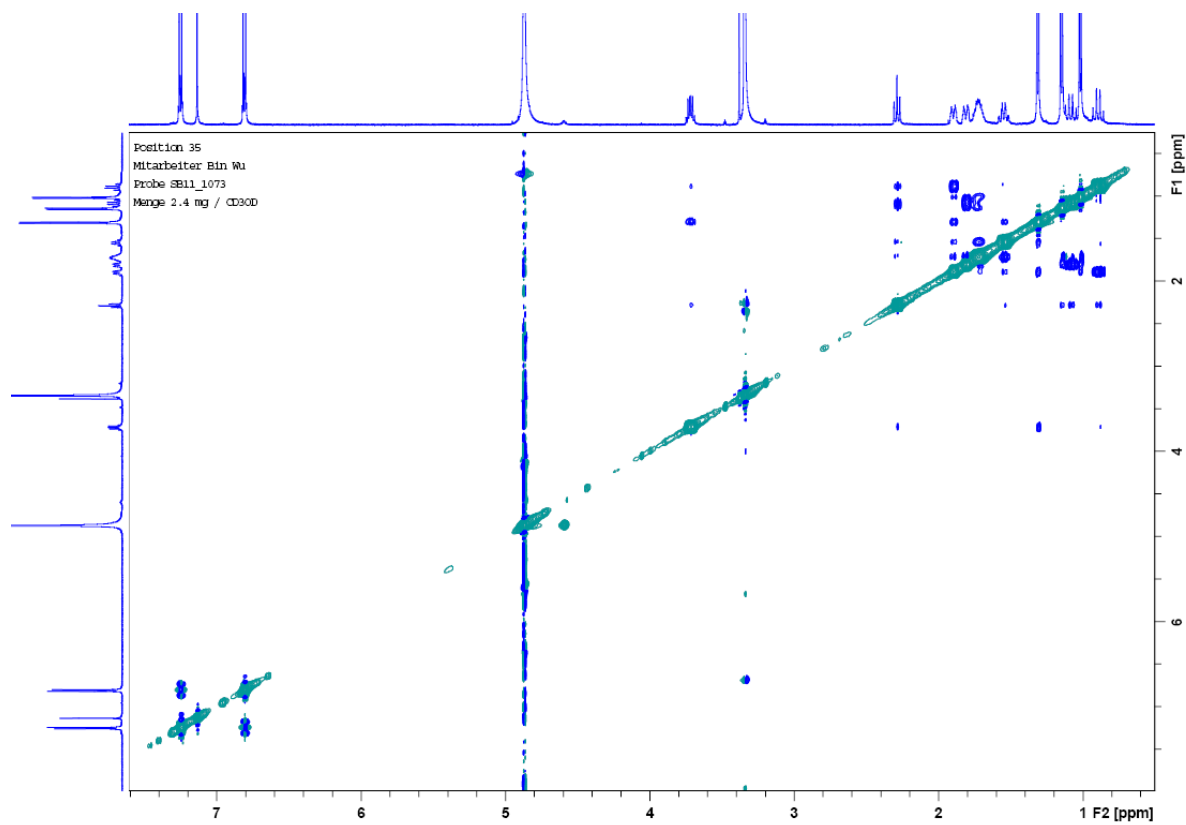

**Figure S11.** NOESY-2 in CD<sub>3</sub>OD for compound 1.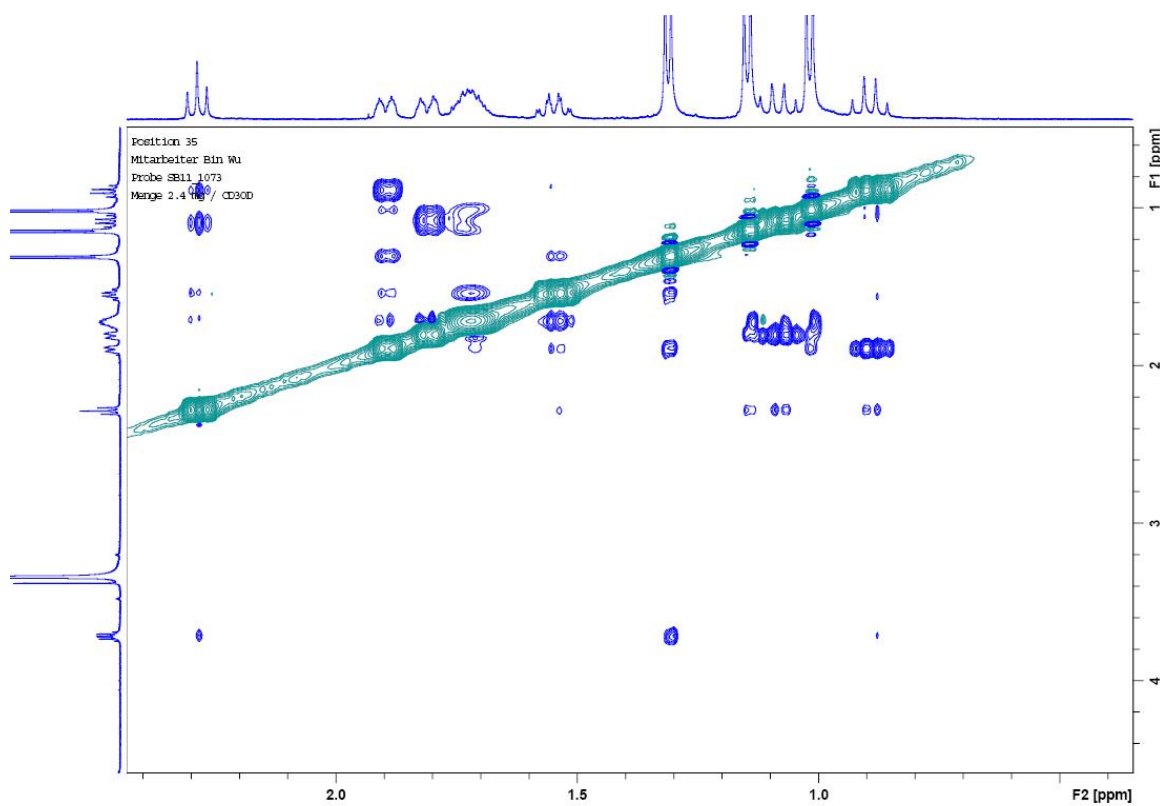**Figure S12.** <sup>1</sup>H NMR in CD<sub>3</sub>OD for compound 2.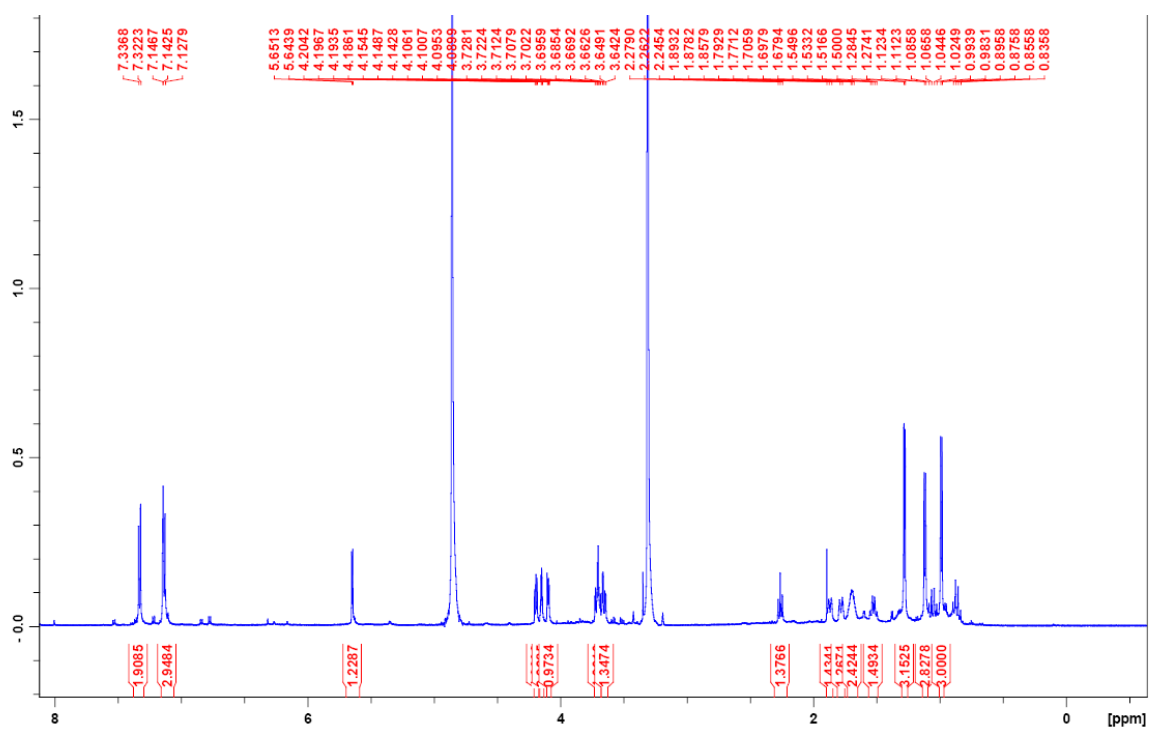

Figure S13.  $^1\text{H}$  NMR-2 in  $\text{CD}_3\text{OD}$  for compound 2.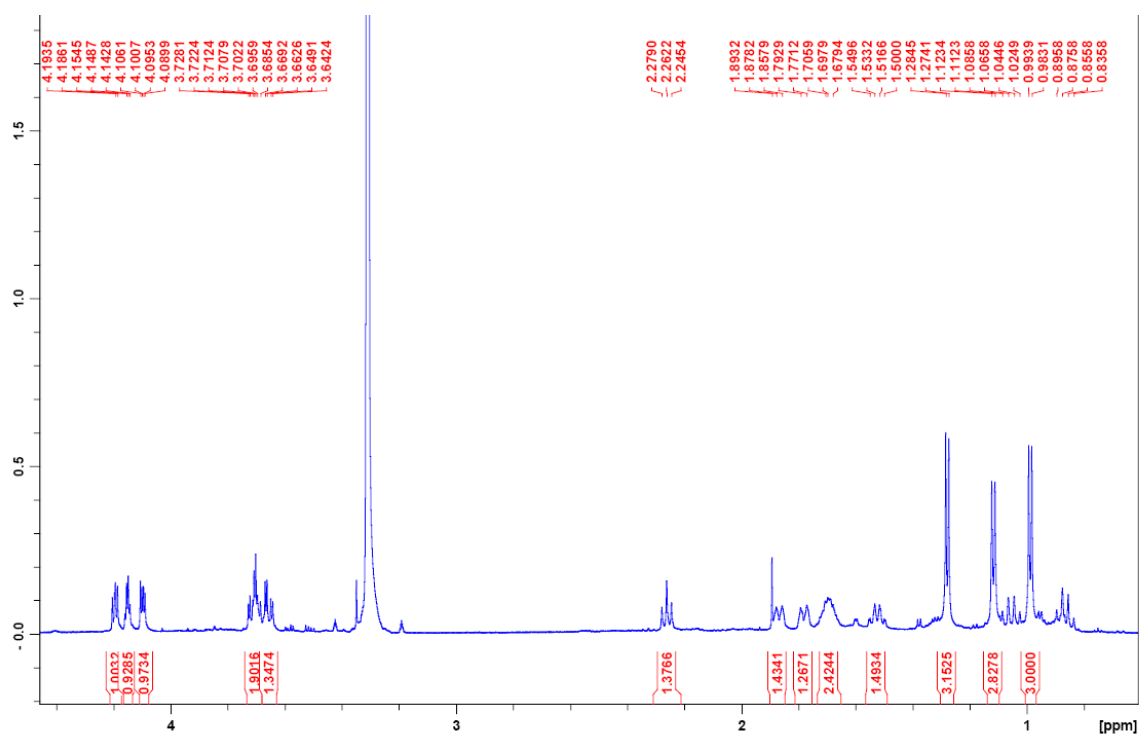Figure S14.  $^{13}\text{C}$  NMR in  $\text{CD}_3\text{OD}$  for compound 2.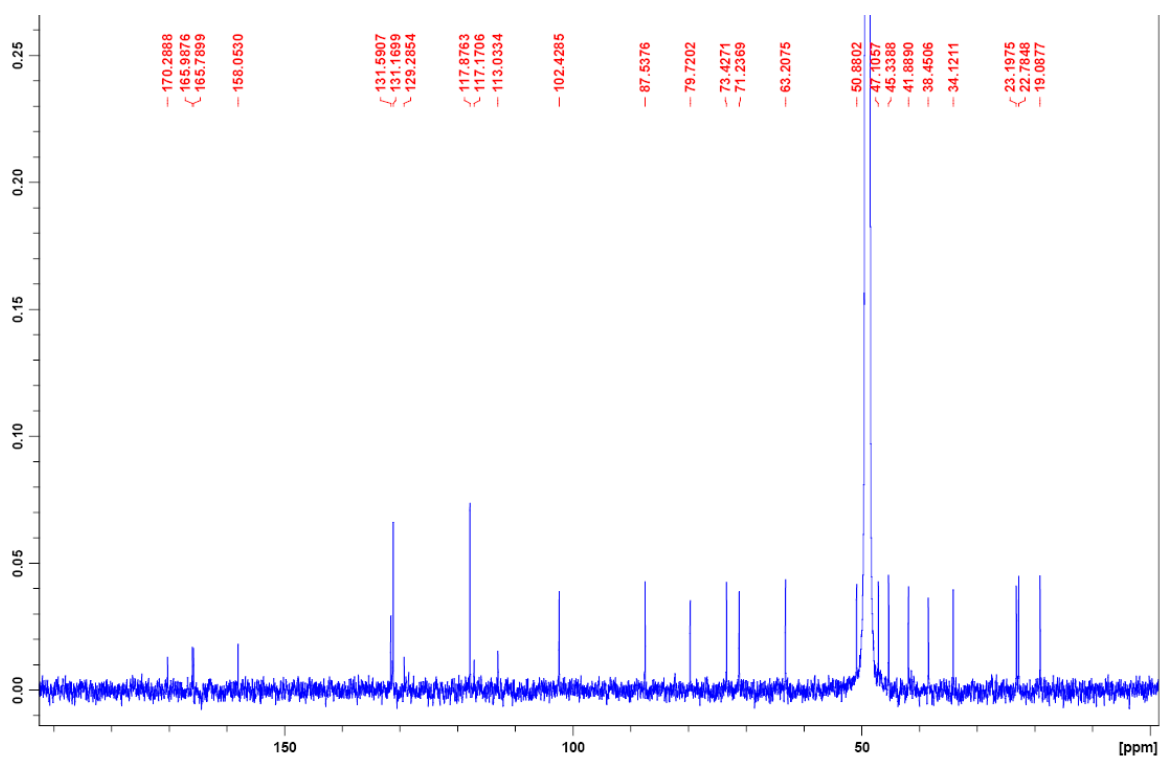



**Figure S15.** COSY in CD<sub>3</sub>OD for compound 2.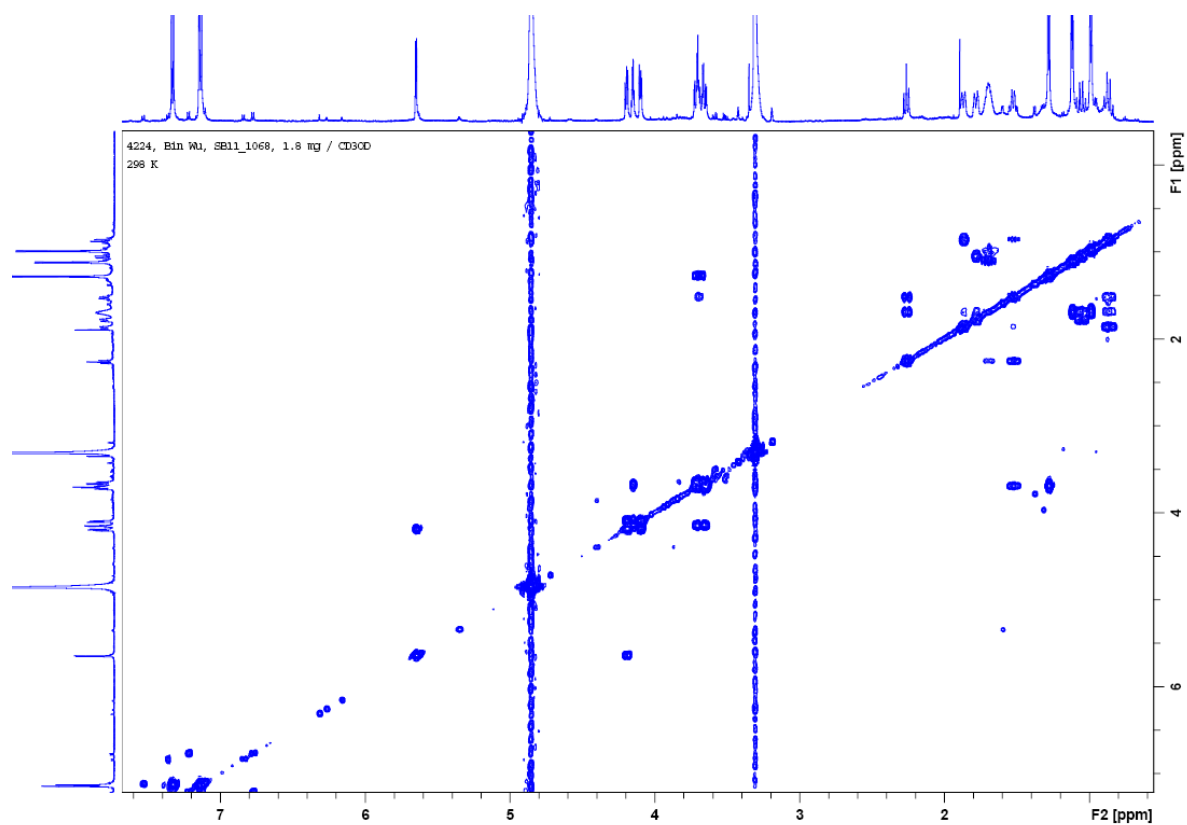**Figure S16.** HSQC in CD<sub>3</sub>OD for compound 2.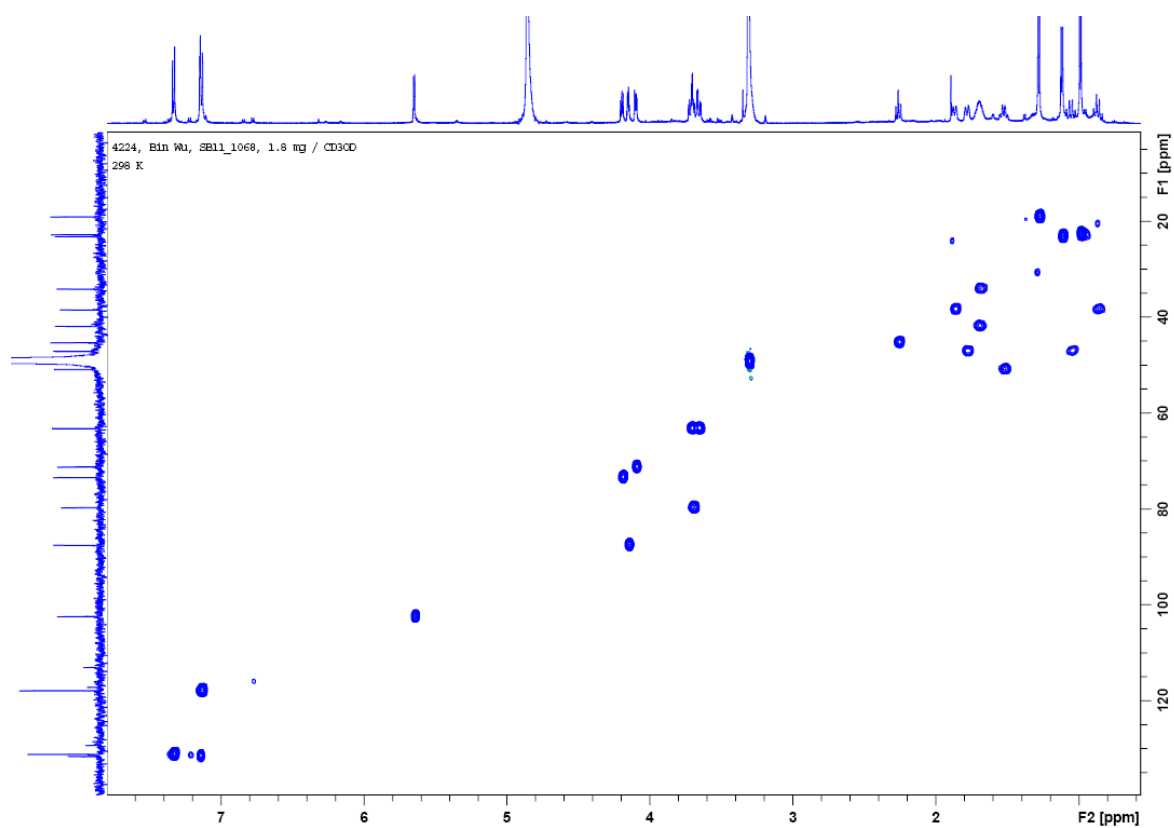

**Figure S17.** HSQC-2 in CD<sub>3</sub>OD for compound 2.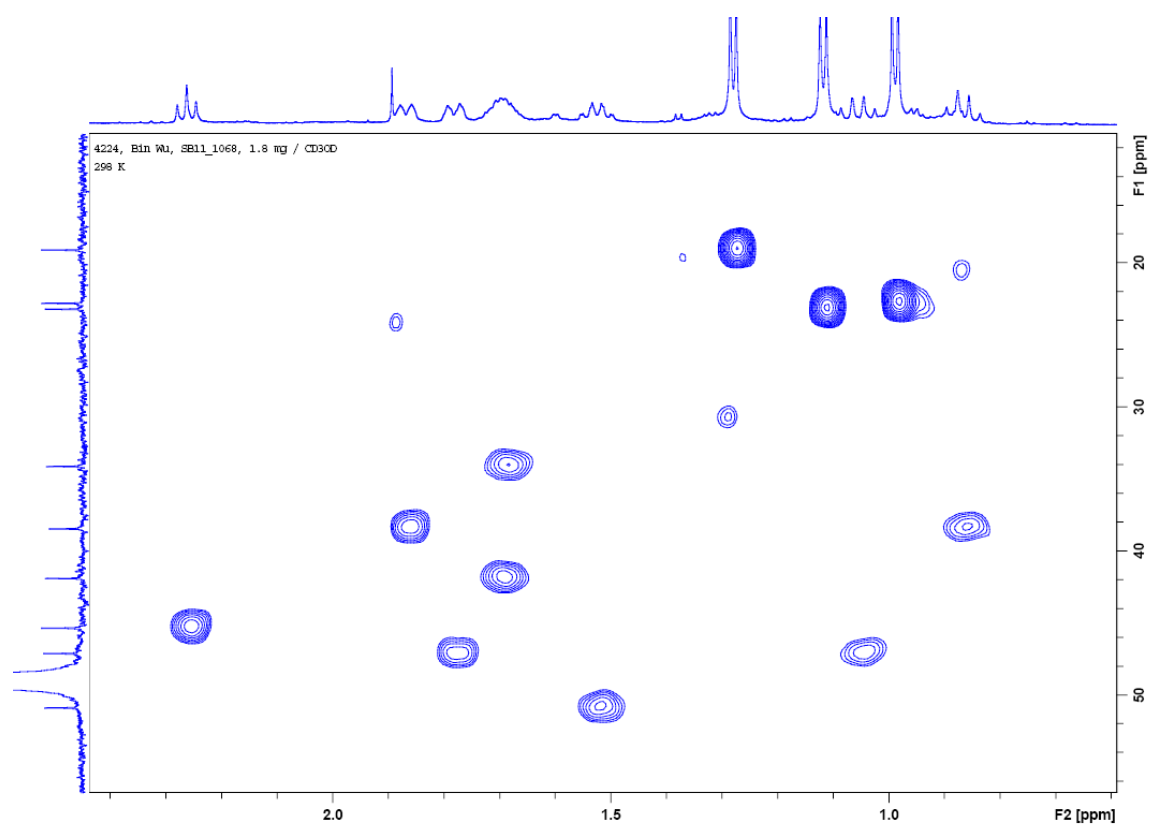**Figure S18.** HMBC in CD<sub>3</sub>OD for compound 2.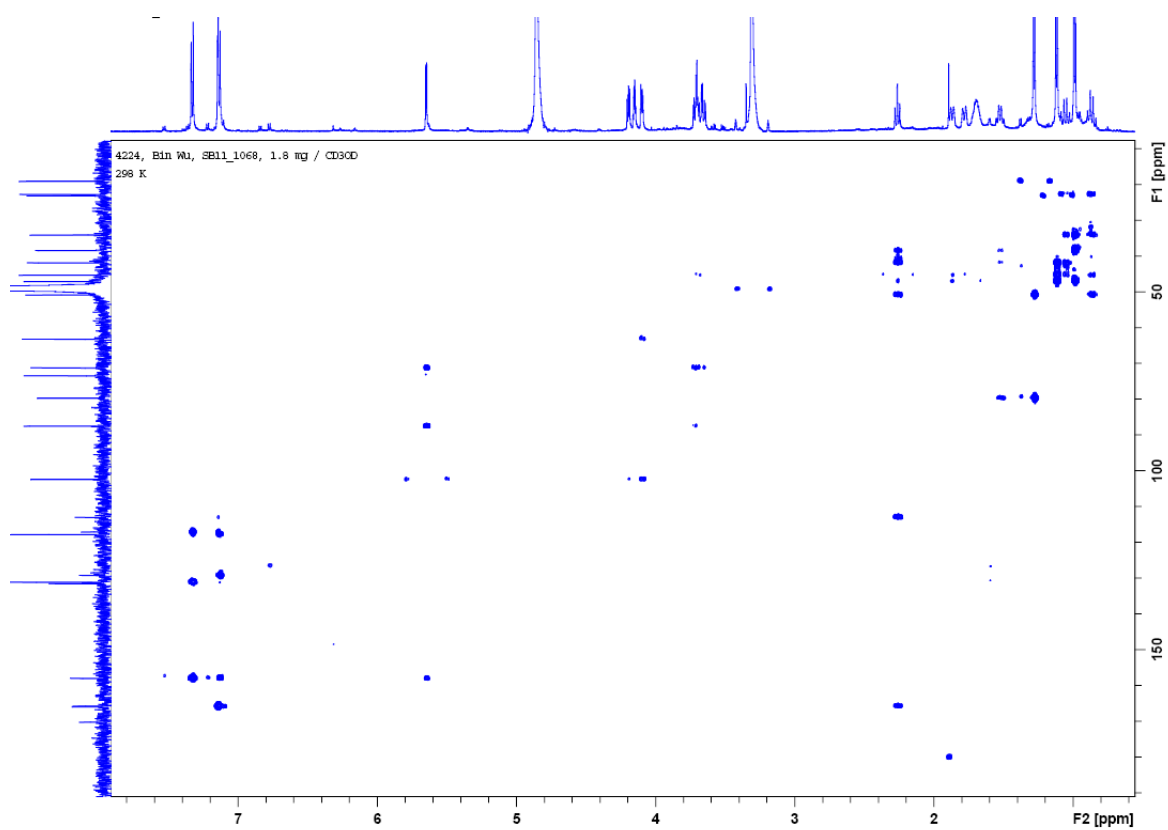

Figure S19. HMBC-2 in CD<sub>3</sub>OD for compound 2.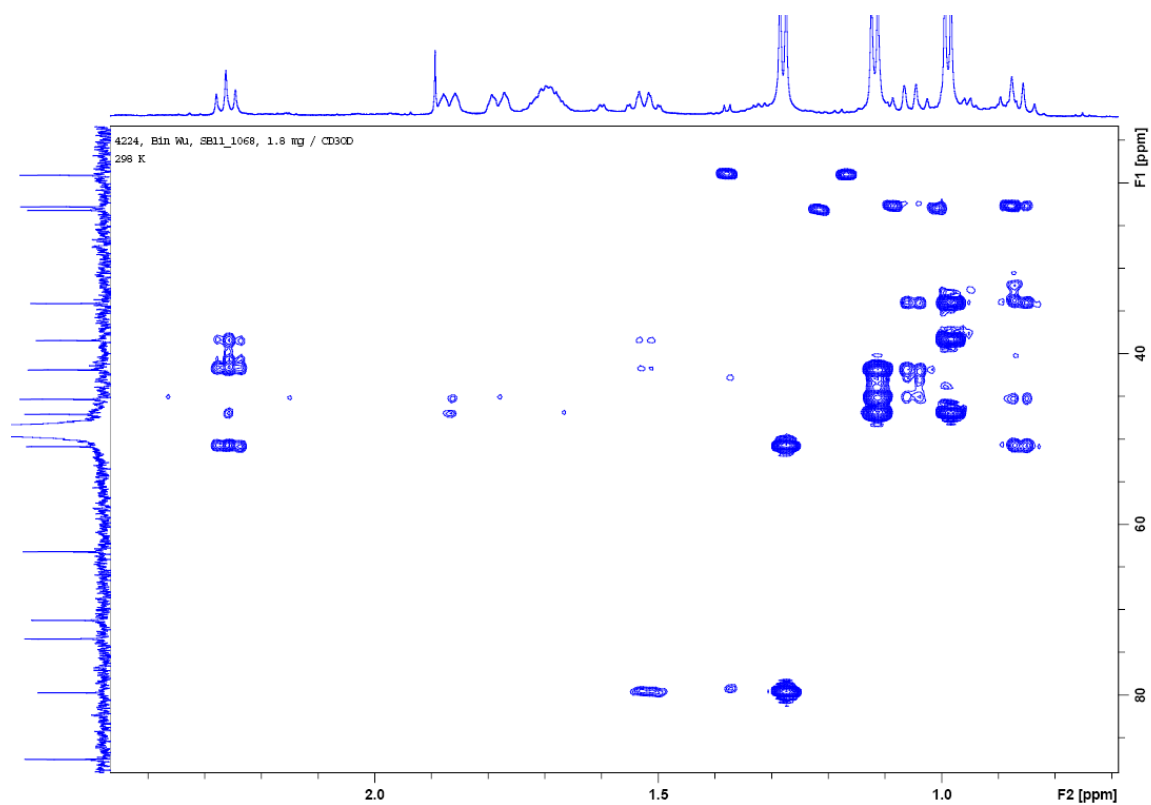

Figure S20. HR-TOF-MS in MeOH for compound 1.

## Acquisition Parameter

|             |          |                      |          |                  |           |
|-------------|----------|----------------------|----------|------------------|-----------|
| Source Type | ESI      | Ion Polarity         | Positive | Set Nebulizer    | 0.8 Bar   |
| Focus       | Active   |                      |          | Set Dry Heater   | 200 °C    |
| Scan Begin  | 50 m/z   | Set Capillary        | 4500 V   | Set Dry Gas      | 5.0 l/min |
| Scan End    | 1000 m/z | Set End Plate Offset | -500 V   | Set Divert Valve | Waste     |

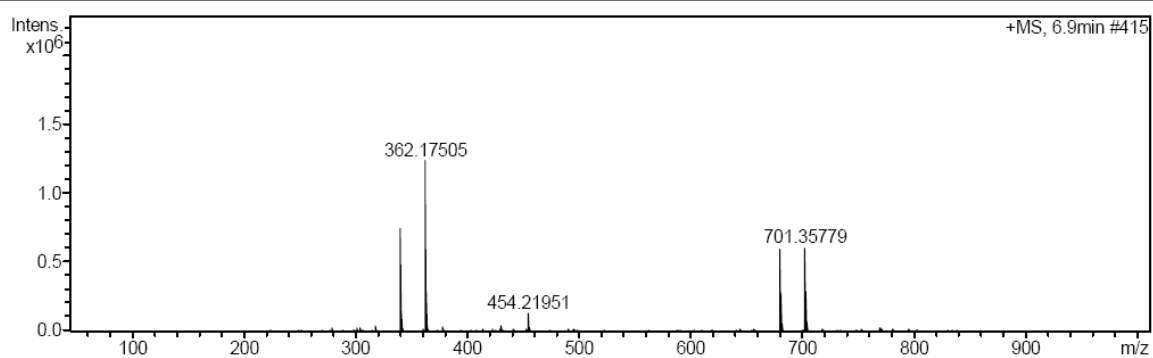

**Figure S21.** HR-TOF-MS in MeOH for compound 2.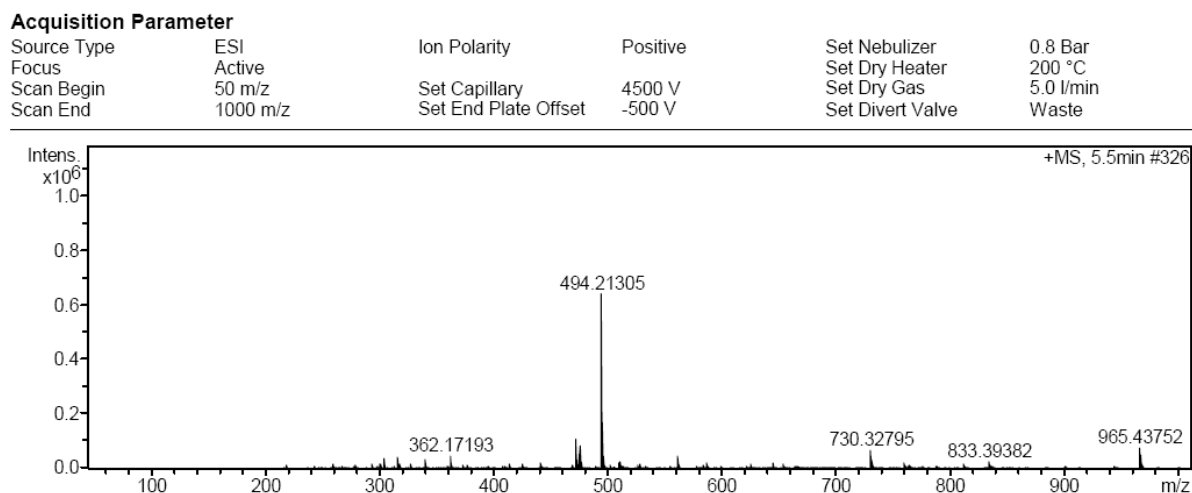

© 2014 by the authors; licensee MDPI, Basel, Switzerland. This article is an open access article distributed under the terms and conditions of the Creative Commons Attribution license (<http://creativecommons.org/licenses/by/3.0/>).
